# Supplementary material for: ADAM23 in Cardiomyocyte Inhibits Cardiac Hypertrophy by Targeting FAK‐AKT Signaling
Source: PubMed Central journal article supplement — J Am Heart Assoc. 2018 Sep 17;7(18):e008604. doi: 10.1161/JAHA.118.008604 (PMC6222933; doi:10.1161/jaha.118.008604), 2018-09-17
Supplement: JAH3-7-e008604-s001.pdf [file JAH3-7-e008604-s001.pdf]

# **Supplemental Material**

**Table S1. Clinical Characteristics of human heart samples.**

| Subject | Diagnosis | Age(years) | Sex    | LVEF (%) | LVEDd (mm) | IVSd (mm) |
|---------|-----------|------------|--------|----------|------------|-----------|
| 1       | Donor     | 49         | Male   | 64       | 46         | 8         |
| 2       | Donor     | 54         | Male   | 68       | 37         | 9         |
| 3       | Donor     | 32         | Male   | 70       | 44         | 7         |
| 4       | Donor     | 50         | Female | 67       | 45         | 7         |
| 5       | Donor     | 57         | Female | 62       | 39         | 7         |
| 6       | Donor     | 50         | Female | N/A      | N/A        | N/A       |
| 1       | DCM       | 36         | Male   | 35       | 68         | 9         |
| 2       | DCM       | 55         | Male   | 24       | 65         | 10        |
| 3       | DCM       | 48         | Female | 32       | 70         | 10        |
| 4       | DCM       | 65         | Male   | 28       | 80         | 9         |
| 5       | DCM       | 63         | Male   | 23       | 70         | 11        |
| 6       | DCM       | 39         | Female | 26       | 60         | 9         |
| 1       | HCM       | 30         | Male   | 65       | N/A        | 22        |
| 2       | HCM       | 42         | Male   | 55       | 40         | 27        |
| 3       | HCM       | 56         | Male   | 60       | N/A        | 25        |
| 4       | HCM       | 44         | Male   | 58       | 45         | 20        |
| 5       | HCM       | 50         | Male   | 74       | N/A        | 31        |
| 6       | HCM       | 40         | Female | 58       | N/A        | 25        |

LVEF=left ventricular ejection fraction; LVEDd=left ventricular end-diastolic dimension; IVSd=interventricular septal thickness at diastole; DCM, dilated cardiomyopathy; HCM, hypertrophic cardiomyopathy; N/A, not available

**Figure S1.** Western blot analysis of ADAM23 in human heart samples (No.5 and 6; n=2 per group) from normal donors, hypertrophic cardiomyopathy (HCM) and dilatedcardiomyopathy (DCM).

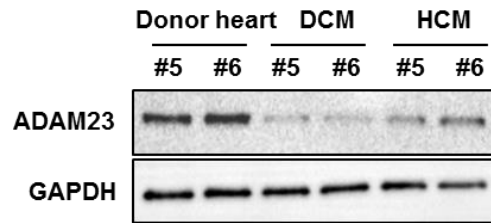

**Figure S2. A,** The Adam23 mRNA levels in the hearts of mice at 4 weeks post the sham or AB surgery (n=4 independent experiments).

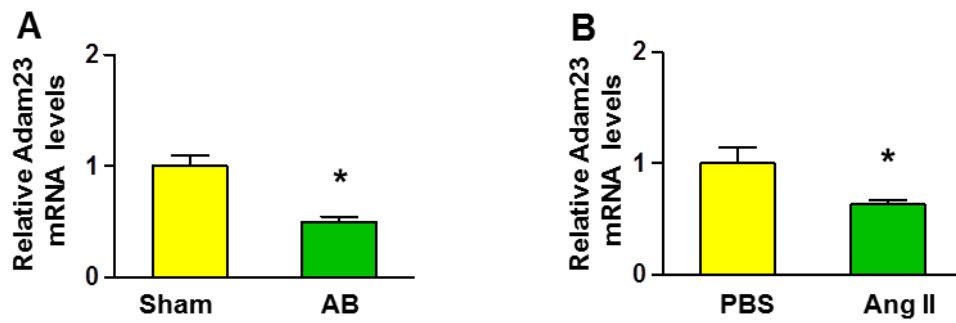

\* $P < 0.05$  vs. the sham group). B, The mRNA levels of Adam23 in cardiomyocytes in response to PBS or Ang II for 24 hour. (n=3 independent experiments; \* $P < 0.05$  vs. PBS group)

**Figure S3.** Schematic diagram of the construction of cardiac-specific conditional Adam23 (cAdam23-KO) and identification of Adam23 expression.

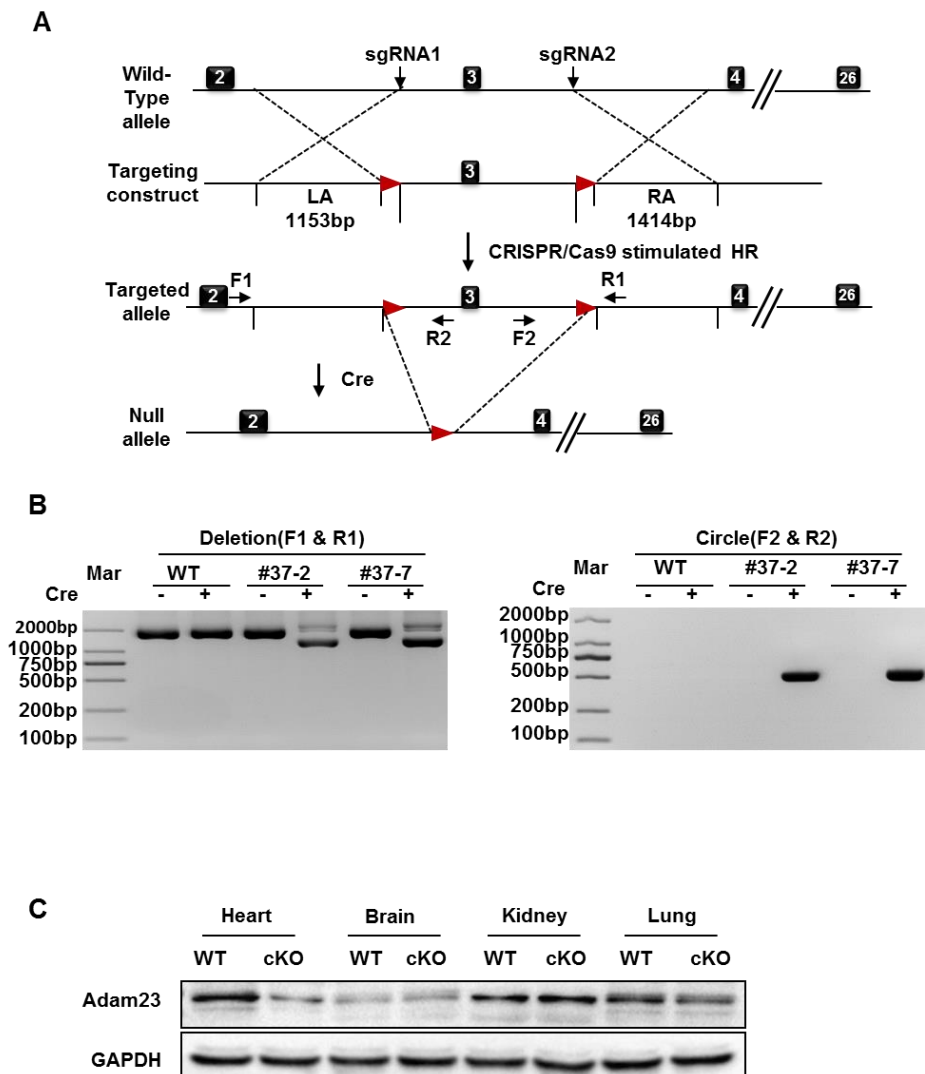

A, Schematic illustration of cAdam23-KO generation. B, Amplification of the entire region covering the floxed and homology arm using the F1/R1 primer (left) and the circle excised by Cre using the F2/R2 primer (right). C, Western blot of Adam23 expression levels in different tissues of WT and cAdam23-KO mice (n =4 per group).

**Figure S4.** Generation of cardiac-specific Adam23 transgenic (Adam23-TG) mice.

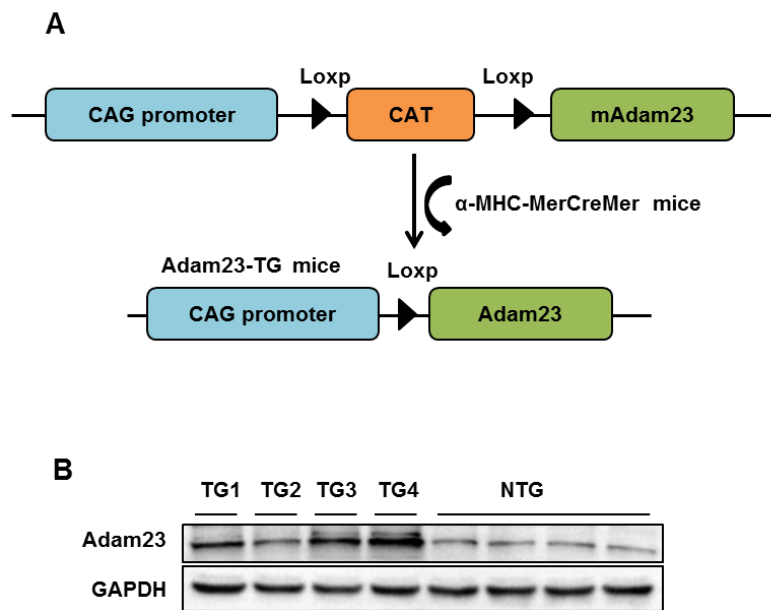

A, Schematic diagram for the construction of the cardiac-specific expression of the Adam23-transgenic (Adam23-TG) mice. B, Western blot analysis of Adam23 levels in the Adam23-TG mice and their NTG littermates (n=4 per group).

**Figure S5.** Adam23 had no effect on cardiomyocyte death during cardiac hypertrophy.

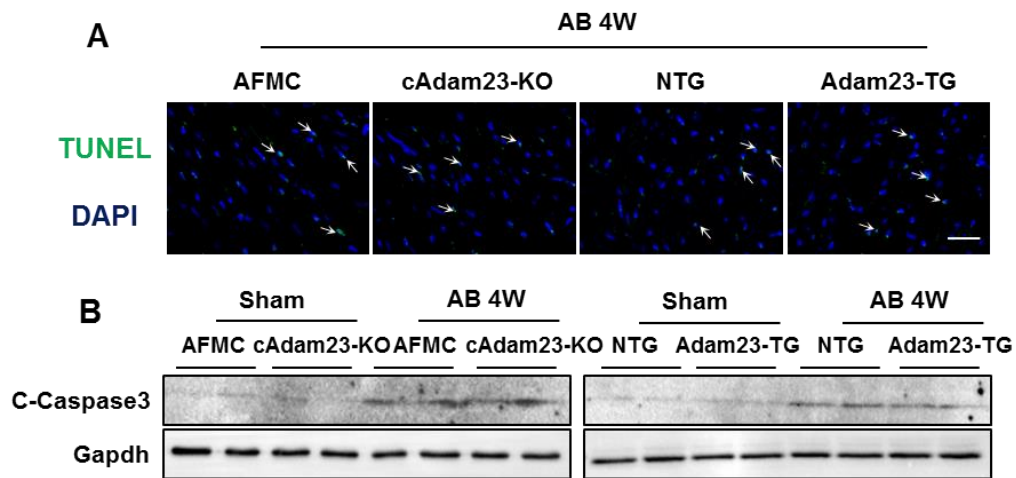

A. TUNEL assays in the heart sections of cAdam23-KO and Adam23-TG mice, compared with their respective controls (n=5 mice per group; scale bar, 20  $\mu$ m). B. Western blot analysis of cleaved caspase3 (C-Caspase3) in the hearts of cAdam23-KO and Adam23-TG mice, compared with their respective controls (n=4 mice per group). Gapdh served as a loading control.
